# Supplementary material
Source: PubMed Central journal article supplement (PMC9713127)
Supplement: 127_2022_2387_MOESM1_ESM.pdf [file 127_2022_2387_MOESM1_ESM.pdf]

## Supplementary material

### Article title:

Ethnic disparities in the use of restrictive practices in adult mental health inpatient settings: a scoping review

### Journal name:

Social Psychiatry and Psychiatric Epidemiology

### Authors:

Martin Locht **Pedersen**<sup>1-3,\*</sup>, Frederik **Gildberg**<sup>2,3</sup>, John **Baker**<sup>4</sup>, Janne Brammer **Damsgaard**<sup>1</sup>, Ellen Boldrup **Tingleff**<sup>2,3,5,6</sup>

### Affiliations:

<sup>1</sup>Department of Public Health, Aarhus University, Bartholins Allé 2, 8000 Aarhus C, Denmark.

<sup>2</sup>Forensic Mental Health Research Unit Middelfart (RFM), Department of Regional Health Research, Faculty of Health Science, University of Southern Denmark, Østre Hougvej 70, 5500 Middelfart, Denmark.

<sup>3</sup>Psychiatric Department Middelfart, Mental Health Services in the Region of Southern Denmark, Østre Hougvej 70, 5500 Middelfart, Denmark.

<sup>4</sup>School of Healthcare, University of Leeds, Baines Wing, Woodhouse Lane, Leeds LS2 9JT, UK.

<sup>5</sup>Nursing Education, Vejle, and Health Sciences Research Center, UCL University College, Vestre Engvej 51C, 7100 Vejle, Denmark.

<sup>6</sup>OPEN, Odense Patient data Explorative Network, Odense University Hospital/Department of Clinical Research, University of Southern Denmark, J.B. Winsløws Vej 9 A, 5000 Odense C, Denmark.

### Corresponding author:

\*Martin Locht Pedersen: marlpedersen@health.sdu.dk

**Table 1** Search subject headings and keywords combined with Boolean operators (OR/AND) in all the selected databases

| Block                                            | CINAHL with Full Text (EBSCO)                                                                                                                                                                         | PubMed (NCBI)                                                                                                                                                                                | PsycINFO (ProQuest)                                                                                                                                                                                                                                                                                                            | Scopus (Elsevier)                                                                                                                                              | Embase (Elsevier)                                                                                                                                                                                                                                                                                                      |
|--------------------------------------------------|-------------------------------------------------------------------------------------------------------------------------------------------------------------------------------------------------------|----------------------------------------------------------------------------------------------------------------------------------------------------------------------------------------------|--------------------------------------------------------------------------------------------------------------------------------------------------------------------------------------------------------------------------------------------------------------------------------------------------------------------------------|----------------------------------------------------------------------------------------------------------------------------------------------------------------|------------------------------------------------------------------------------------------------------------------------------------------------------------------------------------------------------------------------------------------------------------------------------------------------------------------------|
| <b>Population: Descriptors of ethnicity</b>      | MH "Ethnic Groups+" OR MH "Immigrants+" OR Ethnic OR Refugee OR Ethnology OR migrant OR Transient OR Emigrant OR Immigrant OR minority OR race OR continental population OR Ethnological OR Ethnicity | Ethnicity OR Refugee OR Race OR Races OR emigrant OR immigrant OR migrant OR Transient OR Minority OR continental population                                                                 | MAINSUBJECT.EXACT.EXPLODE("Racial and Ethnic Groups") OR MAINSUBJECT.EXACT.EXPLODE("Racial and Ethnic Differences") OR Ethnology OR Ethnic OR refugee OR Ethnicity OR Ethnological OR "continental population*" OR race OR Emigrant OR immigration OR immigrant OR Transient OR migrant Or migration OR minorities OR minority | Ethnology OR Ethnic OR Ethnicity OR Ethnological OR refugee OR continental W/1 population OR emigrant OR immigrant OR transient OR migrant OR race OR minority | 'ethnic group'/exp OR ethnic OR ethnicity OR ethnology OR ethnological OR 'refugee'/exp OR refugee\$ OR 'ancestry group'/exp OR continental NEAR/1 population OR Race\$ OR 'migrant'/exp OR migrant\$ OR emigrant\$ OR immigrant\$ OR 'migration'/exp OR transient\$ OR 'minority group'/exp OR minority OR minorities |
| <b>Concept: Restrictive practices</b>            | Seclusion OR coercion OR Restraint OR Coercive OR compulsory OR involuntarily OR involuntary OR forced medic* OR Tranquiliz*                                                                          | Patient isolation OR coercion OR restraint OR seclusion OR coercive OR involuntarily OR involuntary OR compulsory OR forced medic OR tranquilize                                             | Seclusion OR Coercion OR Restraint OR Coercive OR compulsory OR involuntarily OR Involuntary OR forced medication OR forced medical OR Tranquiliz*                                                                                                                                                                             | Seclusion OR Coercion OR Restraint OR Coercive OR compulsory OR involuntarily OR Involuntary OR Forced W/1 medic* OR Tranquiliz*                               | Seclusion OR coercion OR restraint OR Coercive OR involuntarily OR involuntarily OR compulsory OR forced NEAR/1 medic* OR tranquiliz*                                                                                                                                                                                  |
| <b>Context: Mental health inpatient settings</b> | MH "Forensic psychiatry+" OR Psychiatry OR psychiatric OR secure service OR secure setting OR forensic service OR forensic setting OR Mental health                                                   | Psychiatry OR Mental health OR Psychiatric Department, Hospital OR Hospitals, Psychiatric OR secure service OR secure setting OR forensic service OR forensic setting OR psychiatric service | Psychiatry OR Psychiatric OR secure service OR secure setting OR forensic service OR forensic setting OR mental health                                                                                                                                                                                                         | Psychiatry OR Psychiatric OR secure W/1 service OR secure W/1 setting OR forensic W/1 service OR forensic W/1 setting OR mental W/1 health                     | 'Psychiatry'/exp OR Psychiatry OR 'mental health'/exp OR 'mental health service'/exp OR mental NEAR/1 health OR 'mental hospital'/exp OR psychiatric OR secure NEAR/1 service\$ OR secure NEAR/1 setting\$ OR forensic NEAR/1 service\$ OR forensic NEAR/1 setting\$                                                   |

|                                    |     |                        |       |     |       |
|------------------------------------|-----|------------------------|-------|-----|-------|
|                                    |     | OR psychiatric setting |       |     |       |
| <b>Total hits</b>                  | 295 | 3,158                  | 1,246 | 821 | 1,303 |
| <b>Total hits with limitations</b> | 185 | 1,429                  | 606   | 403 | 779   |

Limitations: language, English; publication year, 2010 to present.

**Table 2** Ethnicity and gender as described in all included studies. NR, Not reported. \*Review studies. MD, missing data about gender

| Author(s) and year          | Most accurate description of ethnicity (n.)                                                                                                                                 | Gender |       |
|-----------------------------|-----------------------------------------------------------------------------------------------------------------------------------------------------------------------------|--------|-------|
|                             |                                                                                                                                                                             | Female | Male  |
| Alda Díez et al. (2010)     | Latin Americans (n = 40), Maghrebian (n = 20), Sub-Saharanians (n = 22), Eastern Europeans (n = 20) and native Spaniards (n = 102)                                          | 100    | 104   |
| Bak et al. (2014)           | Danish/Norwegian (n = NR) and other (n = NR)                                                                                                                                | NR     | NR    |
| Bak et al. (2015)           | Danish/Norwegian (n = NR) and other (n = NR)                                                                                                                                | NR     | NR    |
| Beames and Onwumere (2021)* | Ethnicity (n = 9), migrant status (n = 1), religion (n = 1) and no description of ethnicity (n = 9)                                                                         | NR     | NR    |
| Beghi et al. (2013)*        | Ethnicity (n = 6), race (n = 2), country of origin (n = 1) and no description of ethnicity (n = 40)                                                                         | NR     | NR    |
| Bennewith et al. (2010)     | White (n = 564), Black (n = 138), Asian (n = 47) and mixed ethnicity (n = 24)                                                                                               | NR     | NR    |
| Bilanakis et al. (2010)     | Greek (n = 262) and other (n = 20)                                                                                                                                          | 126    | 156   |
| Bowers et al. (2012)        | White (n = 355) and NR (n = 167)                                                                                                                                            | NR     | NR    |
| Bowers et al. (2010)        | White (n = NR), Irish (n = NR), Caribbean (n = NR), African (n = NR) and Asian (n = NR)                                                                                     | NR     | NR    |
| Collazos et al. (2021)      | Latin Americans (n = 180), North Africans (Maghreb region) (n = 52), Asians (n = 23), Eastern Europeans (n = 34), Western Europeans (n = 41) and native Spaniards (n = 67)  | 199    | 170   |
| Cullen et al. (2018)        | White (n = 1,148), Black African/Caribbean (n = 2,437) and other (n = 414)                                                                                                  | 1,273  | 2,729 |
| Currier et al. (2011)       | White (n = 101) and other (n = 50)                                                                                                                                          | 68     | 83    |
| Drown et al. (2018)         | Māori (n = NR) and non-Māori (n = NR)                                                                                                                                       | NR     | NR    |
| Flammer et al. (2013)       | German (n = 2,843), others from the European Community (n = 102), Turkish (n = 110), others outside the European Community (n = 106) and missing data (n = 228)             | 1,920  | 1,469 |
| Gowda et al. (2018)         | Hindu (n = 181), Muslim (n = 12) and Christian (n = 7)                                                                                                                      | 90     | 110   |
| Happell and Koehn (2010)    | Indigenous status (n = 337) and non-indigenous status (n = 2,907)                                                                                                           | 1,168  | 2,076 |
| Hendryx et al. (2010)       | Black (n = 48), Hispanic (n = 68), Native American (n = 49), White (n = 1,074) and NR (n = 27)                                                                              | 479    | 787   |
| Hui et al. (2016)*          | Ethnicity (n = 1), ethnic groups (n = 1) and no description of ethnicity (n = 16)                                                                                           | NR     | NR    |
| Husum et al. (2010)         | Norwegian background (n = 3,077), not Norwegian background (n = 350) and NR (n = 35)                                                                                        | 1,710  | 1,752 |
| Jury et al. (2019)          | European or other (n = 6501), Māori (n = 3767), Pasifika (n = 651) and Asian (n = 422)                                                                                      | 5,565  | 5,776 |
| Knutzen et al. (2013)       | Asian (n = 35), Africa (n = 27), Southern Europe (n = 13), Northern Europe outside Scandinavia (n = 6), Scandinavia (n = 3), Canada (n = 1) and native Norwegians (n = 286) | 165    | 206   |
| Knutzen et al. (2014)       | Immigrant background (n = 86), native Norwegians (n = 283) and NR (n = 4)                                                                                                   | 166    | 207   |
| Knutzen et al. (2011)       | Immigrant background (n = 149), native Norwegians (n = 594) and NR (n = 6)                                                                                                  | 365    | 384   |
| Lai et al. (2019)           | Māori (n = 3,332) and non-Māori (n = 7,395)                                                                                                                                 | 5,182  | 5,545 |
| Lay et al. (2011)           | Swiss national (n = 7,592) and foreign national (n = 2,106)                                                                                                                 | 4,941  | 4,754 |
| McLeod et al. (2017)        | Māori (n = 1,944) and non-Māori non-Pacific (n = 5,295)                                                                                                                     | NR     | NR    |
| Mellow et al. (2017)*       | Indigenous Australians (n = 1) and no description of ethnicity (n = 10)                                                                                                     | NR     | NR    |
| Miodownik et al. (2019)     | Ashkenazic origin (n = 69), Sephardic origin (n = 62), Ethiopian (n = 13), Muslim (n = 19) and other (n = 13)                                                               | 0      | 176   |

|                               |                                                                                                                                                                                                                                                                                                 |         |         |
|-------------------------------|-------------------------------------------------------------------------------------------------------------------------------------------------------------------------------------------------------------------------------------------------------------------------------------------------|---------|---------|
| Norredam et al. (2010)        | Eastern Europe (n = 4,136), Former Yugoslavia (n = 17,263), north Africa (n = 7,514), Iraq (n = 5,983), Sub-Saharan Africa (n = 2,497), West (n = 6,188), Middle East (n = 12,182), Asia (n = 6,698) and native Danes (n = 249,839)                                                             | 171,283 | 141,017 |
| Opitz-Welke and Konrad (2012) | Turkey (n = 9), Poland (n = 7), rest of Europa (n = 9), Lebanon (n = 7), Iran (n = 2), Tunisia (n = 2), other non-European countries (n = 9) and native Germans (n = 62)                                                                                                                        | 0       | 107     |
| Sambrano and Cox (2013)       | Aboriginal (n = 2), and Aboriginal and Torres Strait Islander (n = 1)                                                                                                                                                                                                                           | 1       | 2       |
| Tarsitani et al. (2013)       | Romania (n = 23), Bulgaria (n = 5), Poland (n = 4), rest of Europe (n = 8), Ukraine (n = 7), Russia (n = 5), Moldavia (n = 4), North Africa (n = 10), rest of Africa (n = 13), Bangladesh (n = 4), rest of Asia (n = 7), Latin America (n = 10) and native Italians (n = 100)                   | 116     | 84      |
| Taylor et al. (2012)          | White (n = 1,877), African American (n = 1,766) and other or missing (n = 120)                                                                                                                                                                                                                  | 1,691   | 2,067   |
| Thomsen et al. (2017)         | 1) African (n = 558), America (n = 432), Eastern Mediterranean (n = 4,444), Europe (n = 104,234), South-East Asia (n = 648), Western Pacific (n = 470) and missing data (n = 1,447);<br>2) immigrants (n = 10,799), refugees (n = 120), native Danes (n = 100,011) and missing data (n = 1,303) | 56,476  | 55,757  |
| Trauer et al. (2010)          | 1) Australian-born (n = 275) and foreign born (n = 77);<br>2) indigenous status (n = 7) and non-indigenous status (n = 345)                                                                                                                                                                     | 139     | 213     |
| Tyrer et al. (2012)           | New Zealand Pakeha (n = 186), Māori (n = 44), European (n = 16) and other (n = 8)                                                                                                                                                                                                               | 116     | 138     |
| van de Sande et al. (2017)    | Western background (n = 612) and other (n = 266)                                                                                                                                                                                                                                                | 340     | 538     |
| Verlinde et al. (2017)        | Non-western descent (n = NR) and NR (n = NR)                                                                                                                                                                                                                                                    | 1,663   | 1,579   |

**Table 3** Definitions of restrictive practices

| <b>Author(s) and year</b>  | <b>Definition of manual restraint</b>                                                                                                                                            |
|----------------------------|----------------------------------------------------------------------------------------------------------------------------------------------------------------------------------|
| Beames and Onwumere (2021) | Manual holding.                                                                                                                                                                  |
| Gowda et al. (2018)        | At least one or more of the patient's limbs/body part is held by staff.                                                                                                          |
| Hui et al. (2016)          | A patient is held by at least one member of staff.                                                                                                                               |
| Norredam et al. (2010)     | Restrain a patient physically.                                                                                                                                                   |
| Thomsen et al. (2017)      | Being held by staff.                                                                                                                                                             |
| <b>Author(s) and year</b>  | <b>Definition of mechanical restraint</b>                                                                                                                                        |
| Bak et al. (2014)          | The use of restraining straps, belts or other equipment to restrict movement.                                                                                                    |
| Bak et al. (2015)          | The use of restraining straps, belts or other equipment to restrict movement.                                                                                                    |
| Beames and Onwumere (2021) | Use of devices such as handcuffs.                                                                                                                                                |
| Bilanakis et al. (2010)    | The use of belts to secure a patient to a bed.                                                                                                                                   |
| Currier et al. (2011)      | The use of mechanical devices to restrict or control a patient's movement.                                                                                                       |
| Flammer et al. (2013)      | The use of belts to fix the patient to the bed.                                                                                                                                  |
| Gowda et al. (2018)        | At least one or more of the patient's limbs are fixated by a mechanical appliance.                                                                                               |
| Hui et al. (2016)          | A device, such as a belt, is attached to a patient.                                                                                                                              |
| Husum et al. (2010)        | Strapping a patient to a bed with mechanical devices (belts).                                                                                                                    |
| Knutzen et al. (2013)      | Different types of belts (for restraint in bed or used outside bed for arms and feet only).                                                                                      |
| Knutzen et al. (2014)      | Different types of belts (for restraint in bed or outside of bed for arms and feet only).                                                                                        |
| Knutzen et al. (2011)      | Different types of belts (for restraint in bed or used outside bed for arms and feet only).                                                                                      |
| Miodownik et al. (2019)    | The use of belts attached to a bed in a special single-bed room in order to restrict movement of each of the patient's arms and legs.                                            |
| Norredam et al. (2010)     | Restrain a patient with the use of a belt.                                                                                                                                       |
| Tarsitani et al. (2013)    | Physical restraint by belt.                                                                                                                                                      |
| Thomsen et al. (2017)      | Fixation by a mechanical appliance, which includes immobilization with leather belts around the waist and/or wrist and ankle cuffs. Gloves are also used, but the use is seldom. |
| <b>Author(s) and year</b>  | <b>Definition of rapid tranquilisation</b>                                                                                                                                       |
| Beames and Onwumere (2021) | Pharmacological measures.                                                                                                                                                        |
| Flammer et al. (2013)      | The application of medication by force with "hands on".                                                                                                                          |
| Gowda et al. (2018)        | The forceful injection of psychotropic medication either intramuscularly or intravenously against the patient's consent/will.                                                    |
| Hui et al. (2016)          | The administration of rapid tranquillisation via intramuscular injection against a patient's will.                                                                               |
| Knutzen et al. (2013)      | Single doses of medications with an antipsychotic or sedative effect that are given by injection or taken orally.                                                                |
| Knutzen et al. (2014)      | Single doses of medications that have an anaesthetic or sedative effect and are given by injection or taken orally.                                                              |
| Knutzen et al. (2011)      | Single doses of medications with an antipsychotic or sedative effect that are given by injection or taken orally.                                                                |
| Thomsen et al. (2017)      | Administration of acute sedative medication.                                                                                                                                     |
| Verlinde et al. (2017)     | The application of intramuscular medication by force against the patient's will.                                                                                                 |
| <b>Author(s) and year</b>  | <b>Definition of seclusion</b>                                                                                                                                                   |
| Beames and Onwumere (2021) | The containment of a person often in a locked room.                                                                                                                              |
| Bilanakis et al. (2010)    | Placing a patient into an empty, locked room.                                                                                                                                    |

|                           |                                                                                                                                                                                                                                                                        |
|---------------------------|------------------------------------------------------------------------------------------------------------------------------------------------------------------------------------------------------------------------------------------------------------------------|
| Bowers et al. (2012)      | Isolated in a locked room.                                                                                                                                                                                                                                             |
| Bowers et al. (2010)      | Isolation of a patient in a locked room.                                                                                                                                                                                                                               |
| Cullen et al. (2018)      | The patient is isolated in a locked room and observed at regular intervals.                                                                                                                                                                                            |
| Drown et al. (2018)       | Where a consumer is placed alone in a room or area, at any time and for any duration, from which they cannot freely exit.                                                                                                                                              |
| Flammer et al. (2013)     | Bringing the patient into a locked room where they are alone and able to move freely but unable to leave, due to the locked door.                                                                                                                                      |
| Gowda et al. (2018)       | Placement of an individual patient in a locked room against patient's will to disengage from harmful behavior displayed by an individual, temporarily restricting contact with the external world and it leads to restriction/loss of patient's freedom and liberties. |
| Hendryx et al. (2010)     | The involuntary confinement of a patient alone in a designated room where the patient was prevented from leaving.                                                                                                                                                      |
| Hui et al. (2016)         | The placement of a patient alone in a locked room that has been specifically designed for this purpose.                                                                                                                                                                |
| Husum et al. (2010)       | Confining a patient in a single room or in a separate unit or area inside the ward, accompanied by staff.                                                                                                                                                              |
| Jury et al. (2019)        | Placing a person alone in a room or area, at any time and for any duration, from which they cannot freely exit.                                                                                                                                                        |
| Knutzen et al. (2011)     | Detention for a short period (up to two hours) behind a locked or closed door without a staff member present.                                                                                                                                                          |
| Lai et al. (2019)         | Where a consumer is placed alone in a room or area, at any time and for any duration, from which they cannot freely exit.                                                                                                                                              |
| Lay et al. (2011)         | Placement and retention of an inpatient in a bare room.                                                                                                                                                                                                                |
| McLeod et al. (2017)      | Placed by themselves in an area or room from which they cannot freely exit.                                                                                                                                                                                            |
| Mellow et al. (2017)      | Supervised confinement.                                                                                                                                                                                                                                                |
| Miodownik et al. (2019)   | Placing the patient in a locked upholstered room.                                                                                                                                                                                                                      |
| Taylor et al. (2012)      | A patient involuntarily confined to a room or area on the hospital unit.                                                                                                                                                                                               |
| Tyrer et al. (2012)       | Isolating individuals in a locked room from which they 'cannot freely exit'.                                                                                                                                                                                           |
| Trauer et al. (2010)      | The sole confinement of a person at any hour of the day or night in a room of which the doors and windows are locked from the outside.                                                                                                                                 |
| Verlinde et al. (2017)    | Bringing the patient into a locked room where he/she is alone and able to move around. The patient is unable to leave due to a locked door.                                                                                                                            |
| <b>Author(s) and year</b> | <b>Definition of restraint</b>                                                                                                                                                                                                                                         |
| Lay et al. (2011)         | Measures prearranged to confine a patient's bodily movements.                                                                                                                                                                                                          |

**Table 4** Multiple restrictive practices. \*Studies dividing ethnicity into more than one category

| <b>Restrictive practices (n.)</b>                                         | <b>Description of ethnicity<br/>Main categories (n.)</b> | <b>References</b>                                                              | <b>Definition of the<br/>restrictive practice</b>       |
|---------------------------------------------------------------------------|----------------------------------------------------------|--------------------------------------------------------------------------------|---------------------------------------------------------|
| Manual restraint and mechanical restraint (n = 3)                         | Mixed categories (n = 1)                                 | Hendryx et al. (2010)                                                          | No                                                      |
|                                                                           | Religion (n = 1)                                         | Gowda et al. (2018)                                                            | Yes                                                     |
|                                                                           | Review (n = 1)                                           | Beames and Onwumere (2021)                                                     | Yes                                                     |
| Manual restraint, mechanical restraint and rapid tranquillisation (n = 3) | Geographical categories (n = 1)                          | Thomsen et al. (2017)*                                                         | Yes                                                     |
|                                                                           | Migrants and native nationals (n = 3)                    | Collazos et al. (2021)<br>Norredam et al. (2010)<br><br>Thomsen et al. (2017)* | No<br>Yes (manual and mechanical restraint only)<br>Yes |
| Manual restraint, mechanical restraint and seclusion (n = 1)              | Mixed categories (n = 1)                                 | Taylor et al. (2012)                                                           | Yes (seclusion only)                                    |
| Mechanical restraint and rapid tranquillisation (n = 3)                   | Migrants and native nationals (n = 3)                    | Knutzen et al. (2013)                                                          | Yes                                                     |
|                                                                           |                                                          | Knutzen et al. (2014)                                                          | Yes                                                     |
|                                                                           |                                                          | Knutzen et al. (2011)                                                          | Yes                                                     |
| Mechanical restraint, rapid tranquillisation and seclusion (n = 2)        | Migrants and native nationals (n = 2)                    | Flammer et al. (2013)                                                          | Yes                                                     |
|                                                                           |                                                          | Knutzen et al. (2011)                                                          | Yes                                                     |
| Mechanical restraint and seclusion (n = 2)                                | Migrants and native nationals (n = 1)                    | Bilanakis et al. (2010)                                                        | Yes                                                     |
|                                                                           | Mixed categories (n = 1)                                 | Miodownik et al. (2019)                                                        | Yes                                                     |
| Restraint and seclusion (n = 3)                                           | Migrants and native nationals (n = 2)                    | Lay et al. (2011)                                                              | Yes                                                     |
|                                                                           |                                                          | Opitz-Welke and Konrad (2012)                                                  | No                                                      |
|                                                                           | Review (n = 1)                                           | Beghi et al. (2013)                                                            | No                                                      |
| Restraint, rapid tranquillisation and seclusion (n = 2)                   | Migrants and native nationals (n = 1)                    | Opitz-Welke and Konrad (2012)                                                  | No                                                      |
|                                                                           | Mixed categories (n = 1)                                 | Bennewith et al. (2010)                                                        | No                                                      |
